# Supplementary material for: ZmDREB2.9 Gene in Maize (Zea mays L.): Genome-Wide Identification, Characterization, Expression, and Stress Response
Source: MDPI journal article supplement (doi:10.3390/plants11223060), 2022-11-11
Supplement: s1 [file s1]

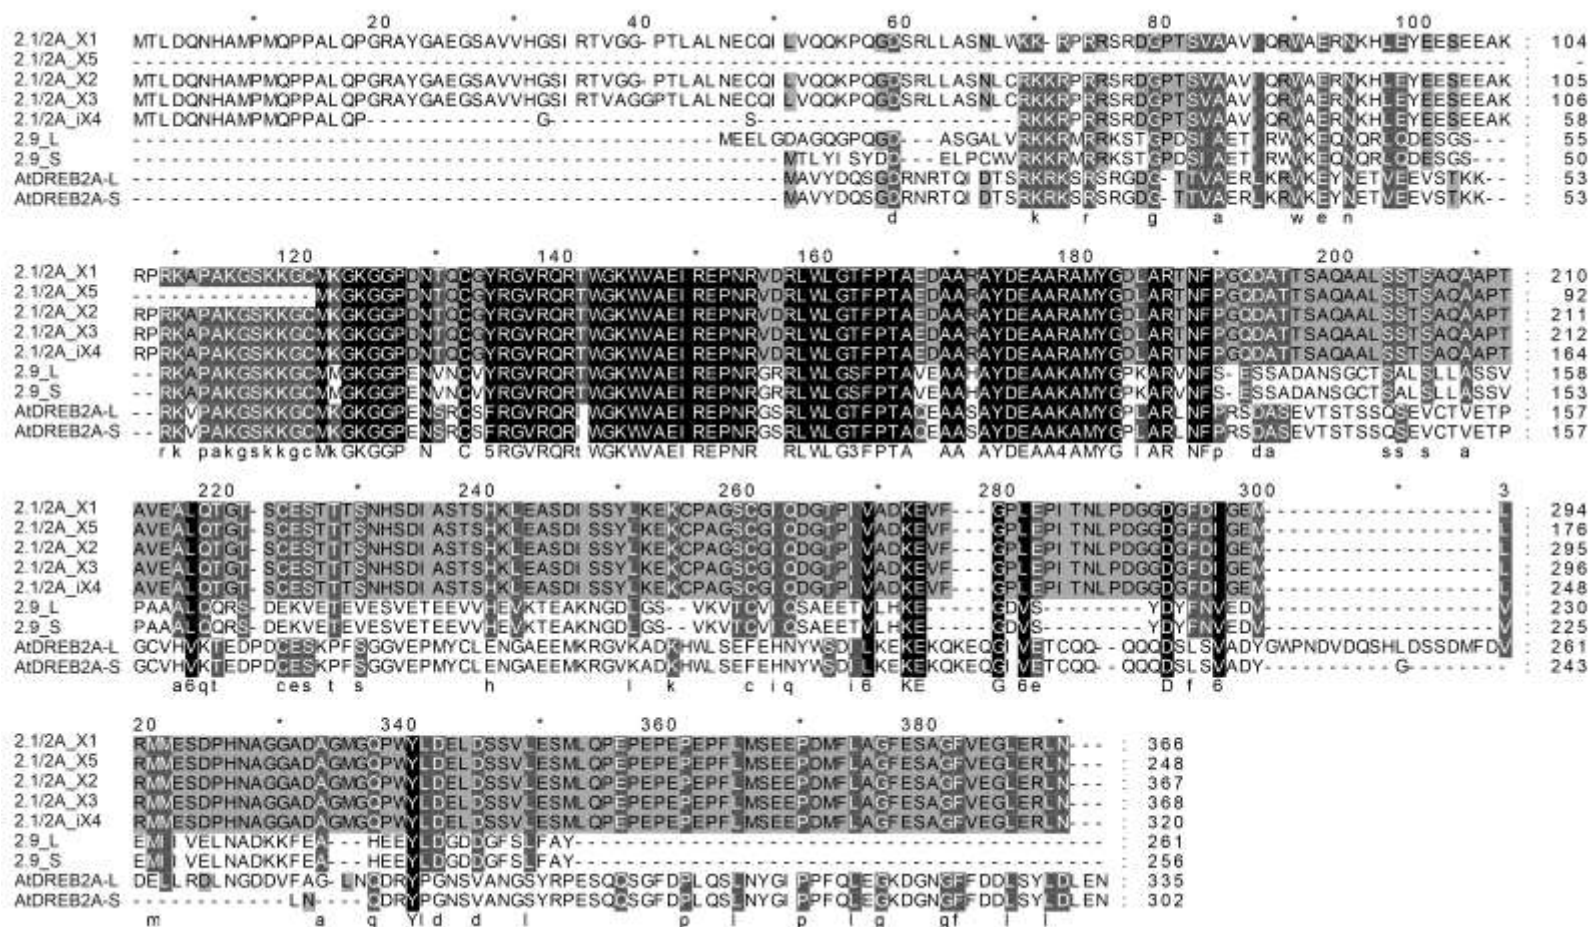

Figure S1. Alignment of ZmDREB2.1/2A, ZmDREB2.9 and AtDREB2A isoforms (indicated according to the Table 1).

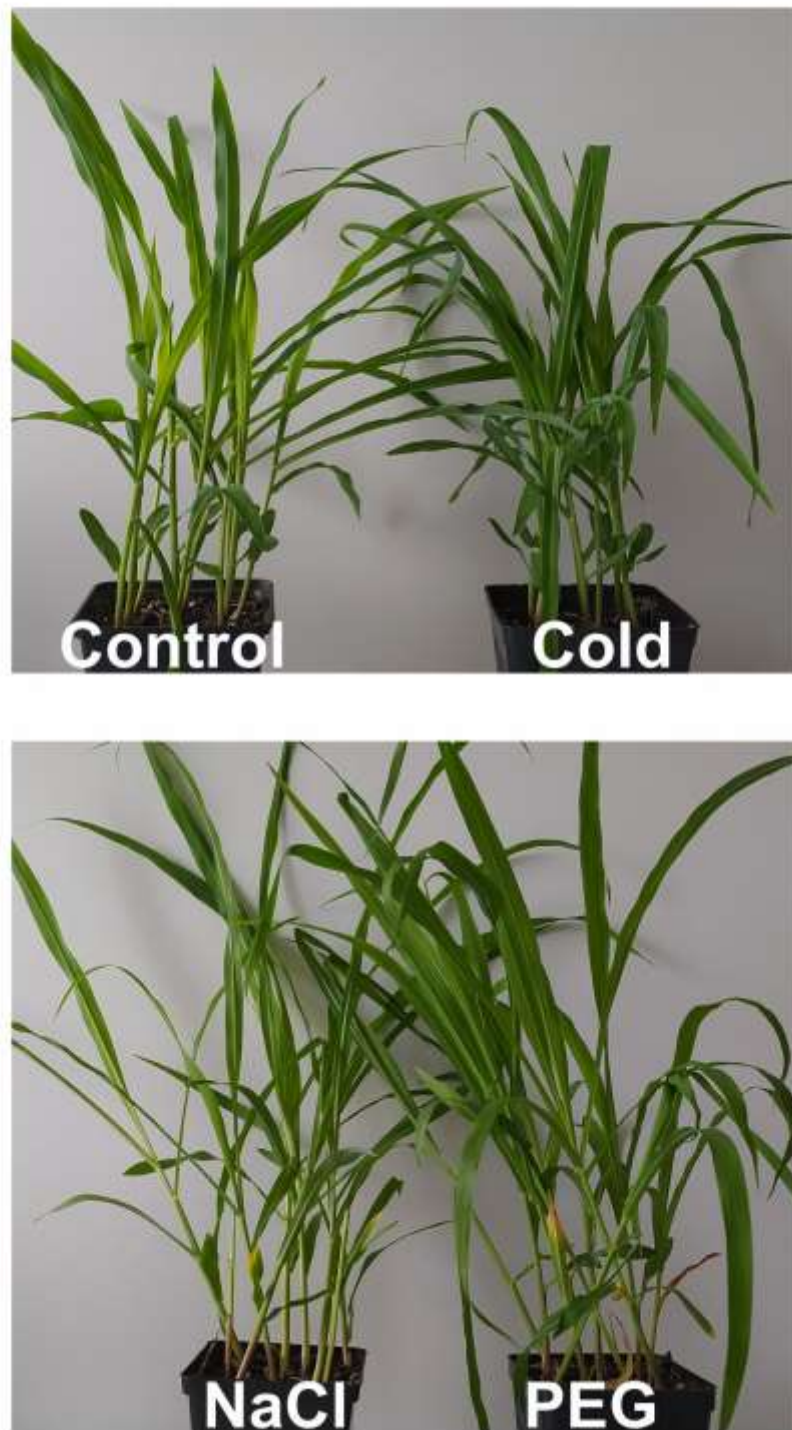

**Figure S2.** Photographs of maize seedlings 24 h after stresses (cold, salinity [NaCl], or drought [PEG]) compared to the untreated control. Seedlings after treatment with ABA are not shown, since outwardly, they did not differ from the control.

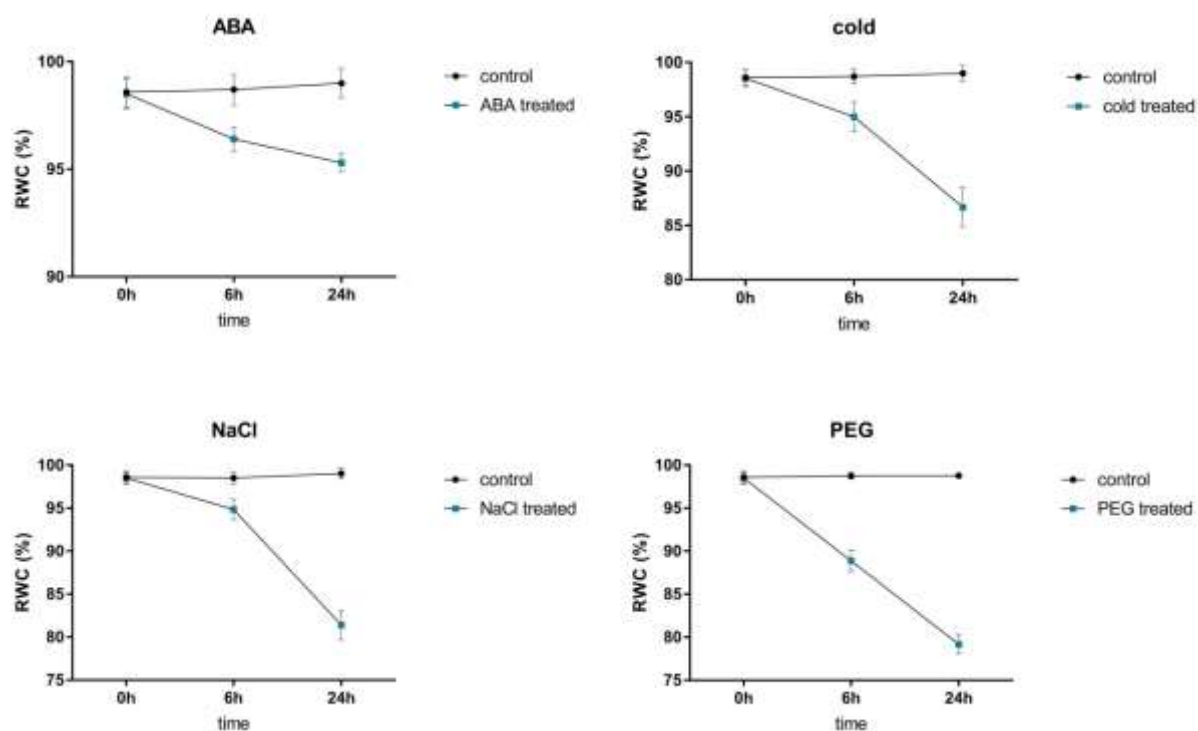

**Figure S3.** Relative water content in the leaf of corn seedlings 6 and 24 hours after stresses (ABA treatment, cold, salinity [NaCl], drought [PEG]) compared to the untreated control.

**Table S1.** List of primers for *ZmDREB2.1/2A–2.9* gene expression analysis.

| Genes                          | Primer sequences (5'→3')                        |
|--------------------------------|-------------------------------------------------|
| <i>ZmDREB2.1/2A</i> (X2; X3)   | GTTCCATCAGAACAGTAGCAGG<br>CAGATTAGAGGCCAGCAGTCG |
| <i>ZmDREB2.1/2A</i> (X1; iso1) | GTTCCATCAGAACAGTAGGAG<br>CAGATTAGAGGCCAGCAGTCG  |
| <i>ZmDREB2.2</i>               | GGACGACGACCCTCATGAC<br>GCCATCGAACCCCTCATGC      |
| <i>ZmDREB2.3</i>               | AAGAAGGGCTCCGGCTCGT<br>TACAGGAGCCGCAGGTAGG      |
| <i>ZmDREB2.4</i>               | CCTGGACCTGGACCTGGA<br>GAACTCCCTGAGGTCGAGC       |
| <i>ZmDREB2.5</i>               | CCCCAGATCGACCTCAGC<br>AGCTGGCTTTAGCAGTAGTCC     |
| <i>ZmDREB2.6</i>               | CAGGGAGTTCTTGCAACAGATC<br>GCCGCTGACGAAGCAAGACA  |
| <i>ZmDREB2.7</i>               | GATGTTCCAGACACCTGCACT<br>CCATCGCGGTGGTAGTGTC    |
| <i>ZmDREB2.8</i>               | GTGATGATGGCTGCCGTCC<br>TCCTGATGCAGAGGAGCCG      |
| <i>ZmDREB2.9-S</i> (X1)        | GACGATGAATTGCCCTGTTGG<br>CTCTTTCCACCACCTGATCG   |
| <i>ZmDREB2.9-L</i> (iso1)      | ATGGAGGAGCTGGGAGACG<br>CTCTTTCCACCACCTGATCG     |
